# Supplementary material for: Associations of Fetal and Infant Growth Patterns With Early Markers of Arterial Health in School-Aged Children
Source: PubMed Central journal article supplement (PMC9244605; doi:10.1001/jamanetworkopen.2022.19225), 2022-06-29
Supplement: jamanetwopen-e2219225-s001.pdf [file jamanetwopen-e2219225-s001.pdf]

## Supplementary Online Content

Gonçalves R, Wiertsema CJ, Silva CCV, et al. Associations of fetal and infant growth patterns with early markers of arterial health in school-aged children. *JAMA Netw Open*. 2022;5(6):e2219225. doi:10.1001/jamanetworkopen.2022.19225

### **eMethods.**

**eTable 1.** Observed Participant Characteristics of the Study Population (N = 4484)

**eTable 2.** Nonresponse Analysis in Singleton Live Births With and Without Outcome Measurements

**eTable 3.** Associations of Birth Outcomes With Childhood Carotid Measurements, Basic Models

**eTable 4.** Associations of Fetal and Infant Growth With Childhood Carotid Measurements From Conditional Analyses, Basic Models

**eTable 5.** Associations of Fetal and Infant Weight Measurements With Childhood Carotid Measurements, Basic Models

**eTable 6.** Associations of Fetal and Infant Growth Patterns With Childhood Carotid Measurements, Basic Models

**eTable 7.** Maternal Prepregnancy BMI for Fetal and Infant Growth Patterns (n = 3485)

**eTable 8.** Sensitivity Analysis Associations of Fetal and Infant Growth Patterns With Childhood Carotid Measurements

**eFigure 1.** Flow Chart of the Study Population

**eFigure 2.** Directed Acyclic Graph (DAG) Depicting the Associations Between Fetal and Infant Weight Measurements, Carotid Intima-Media Thickness, and Distensibility at 10 Years and Potential Covariates, Confounders, and Mediators

### **eReference.**

This supplementary material has been provided by the authors to give readers additional information about their work.

## **eMethods.**

### **First trimester measures**

We constructed gestational age adjusted standard deviation score (SDS) for first trimester fetal crown to rump length [1]. First trimester fetal growth was assessed in a subgroup of mothers who had a fetal first trimester crown to rump measurement within the range of 10 weeks 0 days to 13 weeks 6 days and had a reliable gestational age estimate based on the last menstrual period and a regular menstrual cycle (n = 941).

### **Childhood common carotid artery intima media thickness and distensibility**

When children visited the research facility at the median age of 9.7 years (95% range, 9.3-10.5 years), we measured carotid intima media thickness (cIMT) and distensibility three times at both common carotid arteries using the Logiq E9 device (GE Medical Systems, Wauwatosa, WI, USA). Children were in the supine position, with the head tilted slightly away from the transducer. The common carotid artery was identified in a longitudinal plane, ~10 mm proximal from the carotid bifurcation. We obtained six recordings that ideally included multiple heart cycles. The analyses were performed offline and semi-automatically, using the application Carotid Studio (Cardiovascular Suite (Quipu srl, Pisa, Italy)). For each recording, at all R-waves of the simultaneous ECG, cIMT was computed at the 'far wall' as the average distance between lumen-intima and media-adventitia borders. The average cIMT of all frames of the acquired image sequence was computed. Distensibility was defined as the relative change in lumen area during systole for a given pressure change. Lumen diameter was computed as the average distance between the far and near media-adventitia interfaces, for each frame of the acquired image sequence. Distension was calculated as the difference between the maximal (diastolic) and minimal (systolic) lumen diameter. Per recording, the average distension and diameter values were used to compute average distensibility. Further data processing was performed in R. Children with at least one successful cIMT or

distensibility measurement were included. The overall mean cIMT (mm) and distensibility ( $\text{kPa}^{-1} \cdot 10^{-3}$ ) were used as main outcomes of interest. For the final analyses, distensibility was log-transformed to deal with a skewed distribution. We constructed standard deviation score values  $((\text{observed value} - \text{mean}) / \text{SD})$  for the childhood outcome measures to enable comparison of effect estimates. In a reproducibility study performed among 47 subjects, the interobserver and intraobserver intraclass correlation coefficient were greater than 0.85.

**eTable 1.** Observed Participant Characteristics of the Study Population (N = 4484)<sup>a</sup>

| Characteristics                                             | Number of available cases | Participants, No. (%) |
|-------------------------------------------------------------|---------------------------|-----------------------|
| <b>Maternal</b>                                             |                           |                       |
| Age at enrolment, median (95% range), y                     | 4484                      | 31.2 (20.3, 39.6)     |
| Pre-pregnancy BMI, median (95% range), kg/m <sup>2</sup>    | 3749                      | 22.6 (18.1, 34.6)     |
| Nulliparous                                                 | 4459                      | 2613 (58.6)           |
| Education level, higher education                           | 4258                      | 2134 (50.1)           |
| Race and ethnicity                                          | 4401                      |                       |
| Cape Verdean                                                | 182                       | 182 (4.1)             |
| Dutch                                                       | 2530                      | 2530 (57.5)           |
| Dutch Antilles                                              | 95                        | 95 (2.2)              |
| Moroccan                                                    | 209                       | 209 (4.7)             |
| Surinamese                                                  | 338                       | 338 (7.7)             |
| Turkish                                                     | 312                       | 312 (7.1)             |
| Other <sup>b</sup>                                          | 735                       | 735 (16.7)            |
| Continued smoking during pregnancy                          | 4015                      | 961 (23.9)            |
| Did not use folic acid supplement                           | 3444                      | 752 (21.8)            |
| <b>Fetal</b>                                                |                           |                       |
| First trimester                                             |                           |                       |
| Gestational age, median (95% range), wk                     | 941                       | 12.4 (10.6, 13.8)     |
| Crown rump length, mean (SD), mm                            | 941                       | 61.0 (11.6)           |
| Second trimester                                            |                           |                       |
| Gestational age, median (95% range), wk                     | 4295                      | 20.5 (18.6, 23.3)     |
| Estimated fetal weight, median (95% range), g               | 4238                      | 364 (246, 624)        |
| Third trimester                                             |                           |                       |
| Gestational age, median (95% range), wk                     | 4379                      | 30.4 (28.5, 33.0)     |
| Estimated fetal weight, median (95% range), g               | 4352                      | 1605 (1179, 2218)     |
| <b>Birth</b>                                                |                           |                       |
| Child sex, female                                           | 4484                      | 2260 (50.4)           |
| Gestational age at birth, median (95% range), wk            | 4484                      | 40.1 (35.9, 42.3)     |
| < 37                                                        | 207                       | 207 (4.6)             |
| 37-42                                                       | 4060                      | 4060 (90.5)           |
| >42                                                         | 217                       | 217 (4.8)             |
| Birth weight, median (95% range), g                         | 4479                      | 3450 (2255, 4485)     |
| < 2500                                                      | 196                       | 196 (4.4)             |
| 2500-4500                                                   | 4182                      | 4182 (93.4)           |
| > 4500                                                      | 101                       | 101 (2.3)             |
| Sex- and gestational age adjusted birth weight              | 4476                      |                       |
| Small (<10 <sup>th</sup> percentile)                        | 447                       | 447 (10.0)            |
| Appropriate (10 <sup>th</sup> -90 <sup>th</sup> percentile) | 3582                      | 3582 (80.0)           |
| Large (>90 <sup>th</sup> percentile)                        | 447                       | 447 (10.0)            |
| <b>Infant</b>                                               |                           |                       |

|                                                                                 |      |                   |
|---------------------------------------------------------------------------------|------|-------------------|
| At 6-mo visit                                                                   |      |                   |
| Age at visit, median (95% range), mo                                            | 3401 | 6.2 (5.2, 8.3)    |
| Weight, median (95% range), kg                                                  | 3385 | 7.8 (6.2, 9.8)    |
| At 12-mo visit                                                                  |      |                   |
| Age at visit, median (95% range), y                                             | 3120 | 11.1 (10.1, 12.5) |
| Weight, median (95% range), kg                                                  | 3103 | 9.6 (7.7, 11.8)   |
| At 24-mo visit                                                                  |      |                   |
| Age at visit, median (95% range), y                                             | 2937 | 24.8 (23.4, 28.2) |
| Weight, median (95% range), kg                                                  | 2930 | 12.8 (10.3, 16.2) |
| <b>Childhood</b>                                                                |      |                   |
| Age at follow-up, median (95% range), y                                         | 4484 | 9.7 (9.3, 10.5)   |
| BMI median (95% range), kg/m <sup>2</sup>                                       | 4469 | 17.0 (14.0, 24.9) |
| Carotid intima media thickness, mean (SD), mm                                   | 4484 | 0.46 (0.04)       |
| Carotid distensibility, median (95% range), kPa <sup>-1</sup> *10 <sup>-3</sup> | 4304 | 55.9 (37.1, 85.5) |

BMI: body mass index, mm: millimeter, kg: kilograms. Values are mean (SD), median (95% range), or number (valid %). <sup>a</sup>: Characteristics are based on observed not imputed data. <sup>b</sup>: Included ethnicities other than specified in table: African, American non-western, American western, Asian non-western, Asian western, European, Indonesian and Oceanian.

**eTable 2.** Nonresponse Analysis in Singleton Live Births With and Without Outcome Measurements

| Characteristics                                                    | Children included in the analysis<br>(n = 4484) | Children not included in the analysis<br>(n = 4141)* | p-value |
|--------------------------------------------------------------------|-------------------------------------------------|------------------------------------------------------|---------|
| <b>Maternal</b>                                                    |                                                 |                                                      |         |
| Age at enrolment, median (95% range), y                            | 31.2 (20.3, 39.6)                               | 28.8 (18.5, 38.7)                                    | <0.001  |
| Pre-pregnancy BMI, median (95% range), kg/m <sup>2</sup>           | 22.7 (17.8, 34.1)                               | 22.7 (17.7, 35.5)                                    | 0.06    |
| Parity, n nulliparous (%)                                          | 2628 (58.6)                                     | 2177 (52.5)                                          | <0.001  |
| Education level, n higher education (%)                            | 2187 (48.8)                                     | 1287 (31.1)                                          | <0.001  |
| Ethnicity, n European (%)                                          | 2908 (64.9)                                     | 1936 (46.8)                                          | <0.001  |
| Smoking during pregnancy, n continued (%)                          | 1081 (24.1)                                     | 1273 (30.7)                                          | <0.001  |
| Folic acid supplement use, n did not use (%)                       | 1072 (23.9)                                     | 1637 (39.5)                                          | <0.001  |
| <b>Fetal</b>                                                       |                                                 |                                                      |         |
| First trimester                                                    |                                                 |                                                      |         |
| Gestational age, median (95% range), weeks                         | 12.4 (10.6, 13.8)                               | 12.4 (10.8, 13.9)                                    | 0.97    |
| Crown rump length, mean (SD), mm                                   | 61.0 (11.6)                                     | 60.8 (11.1)                                          | 0.76    |
| Second trimester                                                   |                                                 |                                                      |         |
| Gestational age, median (95% range), weeks                         | 20.5 (18.6, 23.3)                               | 20.5 (18.5, 23.8)                                    | 0.40    |
| Estimated fetal weight, median (95% range), grams                  | 364 (246, 624)                                  | 364 (240, 656)                                       | 0.81    |
| Third trimester                                                    |                                                 |                                                      |         |
| Gestational age, median (95% range), weeks                         | 30.4 (28.5, 33.0)                               | 30.3 (28.0, 33.0)                                    | 0.01    |
| Estimated fetal weight, median (95% range), grams                  | 1605 (1179, 2218)                               | 1580 (1141, 2200)                                    | <0.001  |
| <b>Birth</b>                                                       |                                                 |                                                      |         |
| Child sex, n female (%)                                            | 2260 (50.4)                                     | 2015 (48.7)                                          | 0.10    |
| Gestational age at birth, median (95% range), weeks                | 40.1 (35.9, 42.3)                               | 40.0 (35.3, 42.3)                                    | 0.02    |
| < 37 weeks, n (%)                                                  | 207 (4.6)                                       | 250 (6.0)                                            | 0.01    |
| 37-42 weeks, n (%)                                                 | 4060 (90.5)                                     | 3678 (88.9)                                          | 0.01    |
| >42 weeks, n (%)                                                   | 217 (4.8)                                       | 210 (5.1)                                            | 0.01    |
| Birth weight, median (95% range), grams                            | 3450 (2255, 4485)                               | 3400 (2210, 4490)                                    | <0.001  |
| < 2500 grams, n (%)                                                | 196 (4.4)                                       | 219 (5.4)                                            | 0.10    |
| 2500-4500 grams, n (%)                                             | 4182 (93.4)                                     | 3766 (92.3)                                          | 0.10    |
| > 4500 grams, n (%)                                                | 101 (2.3)                                       | 95 (2.3)                                             | 0.10    |
| Sex- and gestational age adjusted birth weight                     |                                                 |                                                      |         |
| Small (<10 <sup>th</sup> percentile), n (%)                        | 447 (10.0)                                      | 455 (11.2)                                           | 0.18    |
| Appropriate (10 <sup>th</sup> -90 <sup>th</sup> percentile), n (%) | 3582 (80.0)                                     | 3228 (79.3)                                          | 0.18    |
| Large (>90 <sup>th</sup> percentile), n (%)                        | 447 (10.0)                                      | 388 (9.5)                                            | 0.18    |
| <b>Infant</b>                                                      |                                                 |                                                      |         |
| At 6 months visit                                                  |                                                 |                                                      |         |
| Age at visit, median (95% range), months                           | 6.2 (5.2, 8.3)                                  | 6.2 (5.2, 8.3)                                       | 0.45    |
| Weight, median (95% range), kg                                     | 7.8 (6.2, 9.8)                                  | 7.9 (6.2, 9.9)                                       | 0.00    |
| At 12 months visit                                                 |                                                 |                                                      |         |
| Age at visit, median (95% range), years                            | 11.1 (10.1, 12.5)                               | 11.1 (10.1, 12.6)                                    | 0.38    |
| Weight, median (95% range), kg                                     | 9.6 (7.7, 11.8)                                 | 9.7 (7.7, 12.1)                                      | 0.00    |

|                                         |                   |                   |      |
|-----------------------------------------|-------------------|-------------------|------|
| At 24 months visit                      |                   |                   |      |
| Age at visit, median (95% range), years | 24.8 (23.4, 28.2) | 24.8 (23.4, 28.2) | 0.21 |
| Weight, median (95% range), kg          | 12.8 (10.3, 16.2) | 12.9 (10.2, 16.3) | 0.17 |

BMI: body mass index, mm: millimeter, kg: kilograms. \* Children who did not participate in the 10-year follow-up or did not have childhood carotid measurements or had cardiac abnormalities for which exclusion was indicated. Values are mean (SD), median (95% range), or number (valid %). Differences in subject characteristics between the groups were evaluated using Independent Student T-test and Mann-Whitney U for continuous variables and  $\chi^2$  tests for categorical variables.

**eTable 3.** Associations of Birth Outcomes With Childhood Carotid Measurements, Basic Models

|                                                                         | Difference in standard deviation score (95% CI) |                                      |
|-------------------------------------------------------------------------|-------------------------------------------------|--------------------------------------|
|                                                                         | Carotid intima media thickness<br>(n = 4484)    | Carotid distensibility<br>(n = 4304) |
| <b>Birth outcomes</b>                                                   | Basic Model                                     | Basic Model                          |
| <b>Birth weight</b>                                                     |                                                 |                                      |
| < 2500 grams (n = 196)                                                  | -0.04 (-0.18, 0.10)                             | 0.10 (-0.05, 0.25)                   |
| 2500-4500 grams (n = 4182)                                              | <i>Reference</i>                                | <i>Reference</i>                     |
| > 4500 grams (n = 101)                                                  | 0.13 (-0.06, 0.33)                              | -0.24 (-0.44, -0.04)*                |
| <i>Continuously (per 500 grams)</i>                                     | 0.06 (0.04, 0.09)*                              | -0.05 (-0.08, -0.03)*                |
| <b>Size for gestational age at birth</b>                                |                                                 |                                      |
| Small <10 <sup>th</sup> percentile (n = 447)                            | -0.12 (-0.22, -0.02)*                           | 0.12 (0.02, 0.22)*                   |
| Appropriate 10 <sup>th</sup> -90 <sup>th</sup> percentile<br>(n = 3582) | <i>Reference</i>                                | <i>Reference</i>                     |
| Large >90 <sup>th</sup> percentile (n = 447)                            | 0.09 (-0.01, 0.18)                              | -0.11 (-0.21, -0.01)*                |
| <i>Continuously (per 1 SD grams)</i>                                    | 0.07 (0.04, 0.09)*                              | -0.07 (-0.10, -0.04)*                |
| <b>Gestational age at birth</b>                                         |                                                 |                                      |
| < 37 weeks (n = 207)                                                    | -0.08 (-0.22, 0.06)                             | 0.04 (-0.10, 0.18)                   |
| 37-42 weeks (n = 4060)                                                  | <i>Reference</i>                                | <i>Reference</i>                     |
| >42 weeks (n = 217)                                                     | 0.06 (-0.07, 0.20)                              | 0.02 (-0.12, 0.16)                   |
| <i>Continuously (per week)</i>                                          | 0.02 (-0.001, 0.03)                             | -0.00 (-0.02, 0.01)                  |

CI: Confidence interval. \*P value <0.05. Values are regression coefficients (95% confidence interval) that were obtained from multivariable linear regression models and reflect the differences in carotid intima media thickness (SDS) and carotid distensibility (SDS) for birth outcomes. Estimates are from multiple imputed data. The basic model is adjusted for child age at the outcome visit and sex.



**eTable 4.** Associations of Fetal and Infant Growth With Childhood Carotid Measurements From Conditional Analyses, Basic Models

|                                                         | Difference in standard deviation score (95% CI) |                                      |
|---------------------------------------------------------|-------------------------------------------------|--------------------------------------|
|                                                         | Carotid intima media thickness<br>(n = 2249)    | Carotid distensibility<br>(n = 2137) |
| <b>Infant and fetal weight standard deviation score</b> | Basic model                                     | Basic model                          |
| At 20 weeks                                             | 0.03 (-0.02, 0.07)                              | -0.01 (-0.06, 0.03)                  |
| At 30 weeks                                             | 0.07 (0.03, 0.11)**                             | -0.04 (-0.08, 0.01)                  |
| At birth                                                | 0.04 (0.004, 0.08)*                             | -0.01 (-0.05, 0.04)                  |
| At 6 months                                             | 0.05 (0.01, 0.09)*                              | -0.05 (-0.09, -0.01)*                |
| At 12 months                                            | 0.05 (0.01, 0.09)*                              | -0.06 (-0.10, -0.01)*                |
| At 24 months                                            | 0.06 (0.02, 0.10)**                             | -0.11 (-0.15, -0.06)**               |

CI: Confidence interval. \**P* value <0.05. \*\**P* value <0.001. Values are regression coefficients (95% confidence interval) and reflect the differences in carotid intima media thickness (SDS) and carotid distensibility (SDS) per SDS change in infant and fetal weight from conditional models. Conditional regression analysis take into account the correlations between the weight measurement to identify independent critical weight periods. Standardized residuals resulting from linear regression models of weight regressed on all prior weights were used to construct weight variables, statistically independent from weight at earlier time points. Estimates are from multiple imputed data. The basic model is adjusted for child age at the outcome visit and sex.

**eTable 5.** Associations of Fetal and Infant Weight Measurements With Childhood Carotid Measurements, Basic Models

| Infant and fetal weight standard deviation score | Difference in standard deviation score (95% CI) |                     |                     |                                      |                       |                       |
|--------------------------------------------------|-------------------------------------------------|---------------------|---------------------|--------------------------------------|-----------------------|-----------------------|
|                                                  | Carotid intima media thickness<br>(n = 4484)    |                     |                     | Carotid distensibility<br>(n = 4304) |                       |                       |
|                                                  | Basic model                                     | Confounder model    | BMI model           | Basic model                          | Confounder model      | BMI model             |
| At first trimester (n = 942)                     | -0.01 (-0.07, 0.06)                             | -0.00 (-0.07, 0.06) | -0.00 (-0.07, 0.07) | -0.03 (-0.10, 0.04)                  | -0.03 (-0.10, 0.04)   | -0.03 (-0.10, 0.03)   |
| At 20 wk (n = 4238)                              | 0.02 (-0.01, 0.05)                              | 0.03 (-0.01, 0.06)  | 0.02 (-0.01, 0.05)  | -0.03 (-0.06, -0.001)*               | -0.03 (-0.06, 0.001)  | -0.03 (-0.06, 0.01)   |
| At 30 wk (n = 4352)                              | 0.05 (0.03, 0.08)*                              | 0.06 (0.03, 0.09)*  | 0.06 (0.03, 0.09)*  | -0.05 (-0.08, -0.02)*                | -0.05 (-0.08, -0.02)* | -0.04 (-0.07, -0.01)* |
| At birth (n = 4476)                              | 0.07 (0.04, 0.09)*                              | 0.08 (0.05, 0.11)*  | 0.07 (0.04, 0.10)*  | -0.07 (-0.10, -0.04)*                | -0.07 (-0.10, -0.04)* | -0.05 (-0.08, -0.02)* |
| At 6 mo (n = 3385)                               | 0.10 (0.07, 0.14)*                              | 0.11 (0.07, 0.14)*  | 0.09 (0.06, 0.13)*  | -0.07 (-0.11, -0.04)*                | -0.07 (-0.10, -0.03)* | -0.02 (-0.06, 0.02)   |
| At 12 mo (n = 3103)                              | 0.12 (0.08, 0.15)*                              | 0.13 (0.09, 0.17)*  | 0.12 (0.08, 0.16)*  | -0.11 (-0.15, -0.07)*                | -0.10 (-0.14, -0.06)* | -0.05 (-0.09, -0.01)* |
| At 24 mo (n = 2930)                              | 0.13 (0.09, 0.16)*                              | 0.14 (0.10, 0.18)*  | 0.13 (0.09, 0.17)*  | -0.16 (-0.19, -0.12)*                | -0.14 (-0.19, -0.11)* | -0.10 (-0.14, -0.08)* |

CI: Confidence interval. \**P* value <0.05. Values are regression coefficients (95% confidence interval) that were obtained from multivariable linear regression models and reflect the differences in carotid intima media thickness (SDS) and carotid distensibility (SDS) for birth outcomes. Estimates are from multiple imputed data. The basic model is adjusted for child age at the outcome visit and sex. The confounder model is the basic model additionally adjusted for maternal age, pre-pregnancy body mass index, educational level, ethnicity, folic acid use, smoking and gestational hypertensive disorders. The BMI model is the confounder model additionally adjusted for sex-and gestational age adjusted child body mass index at the outcome measurement.

**eTable 6.** Associations of Fetal and Infant Growth Patterns With Childhood Carotid Measurements, Basic Models

|                                         | Difference in standard deviation score (95% CI) |                                      |
|-----------------------------------------|-------------------------------------------------|--------------------------------------|
|                                         | Carotid intima media thickness<br>(n = 3485)    | Carotid distensibility<br>(n = 3316) |
| <b>Fetal and infant growth patterns</b> | Basic model                                     | Basic model                          |
| Fetal growth deceleration               |                                                 |                                      |
| Infant growth deceleration (n = 122)    | -0.00 (-0.19, 0.18)                             | 0.12 (-0.08, 0.32)                   |
| Infant normal growth (n = 382)          | -0.06 (-0.18, 0.06)                             | 0.01 (-0.11, 0.14)                   |
| Infant growth acceleration (n = 397)    | 0.05 (-0.07, 0.17)                              | -0.09 (-0.22, 0.03)                  |
| Fetal normal growth                     |                                                 |                                      |
| Infant growth deceleration (n = 336)    | 0.00 (-0.12, 0.13)                              | 0.10 (-0.03, 0.23)                   |
| Infant normal growth (n = 812)          | <i>Reference</i>                                | <i>Reference</i>                     |
| Infant growth acceleration (n = 400)    | 0.19 (0.07, 0.31)*                              | -0.17 (-0.29, -0.05)*                |
| Fetal growth acceleration               |                                                 |                                      |
| Infant growth deceleration (n = 122)    | -0.01 (-0.12, 0.11)                             | -0.04 (-0.16, 0.08)                  |
| Infant normal growth (n = 383)          | 0.11 (0.004, 0.22)*                             | -0.06 (-0.17, 0.06)                  |
| Infant growth acceleration (n = 397)    | 0.10 (-0.07, 0.27)                              | -0.11 (-0.28, 0.07)                  |

CI: confidence interval.\**P* value <0.05. Values are regression coefficients (95% confidence interval) and reflect the differences in carotid intima media thickness (SDS) and carotid distensibility (SDS) for fetal and infant growth patterns from multivariable linear regression models. Estimates are from multiple imputed data. The basic model is adjusted for child age at the outcome visit and sex.

**eTable 7.** Maternal Prepregnancy BMI for Fetal and Infant Growth Patterns (n = 3485)<sup>a</sup>

| <b>Fetal and infant growth patterns</b> | <b>Pre-pregnancy BMI, median (95% range), kg/m<sup>2</sup></b> |
|-----------------------------------------|----------------------------------------------------------------|
| Fetal growth deceleration               |                                                                |
| Infant growth deceleration (n = 122)    | 22.6 (17.7, 34.0)                                              |
| Infant normal growth (n = 382)          | 22.5 (17.9, 34.3)                                              |
| Infant growth acceleration (n = 397)    | 22.3 (17.6, 36.7)                                              |
| Fetal normal growth                     |                                                                |
| Infant growth deceleration (n = 336)    | 22.7 (17.8, 32.2)                                              |
| Infant normal growth (n = 812)          | 22.2 (18.0, 33.9)                                              |
| Infant growth acceleration (n = 400)    | 22.5 (18.0, 34.5)                                              |
| Fetal growth acceleration               |                                                                |
| Infant growth deceleration (n = 422)    | 22.7 (18.5, 35.8)                                              |
| Infant normal growth (n = 469)          | 22.8 (18.4, 34.6)                                              |
| Infant growth acceleration (n = 145)    | 23.4 (18.6, 36.3)                                              |

BMI: body mass index, m<sup>2</sup>: square meter, kg: kilograms. Values are median (95% range).

<sup>a</sup>: Characteristics are based on the pooled results after multiple imputations.

**eTable 8.** Sensitivity Analysis Associations of Fetal and Infant Growth Patterns With Childhood Carotid Measurements

|                                         | Difference in standard deviation score (95% CI) |                     |                                      |                     |
|-----------------------------------------|-------------------------------------------------|---------------------|--------------------------------------|---------------------|
|                                         | Carotid intima media thickness<br>(n = 2789)    |                     | Carotid distensibility<br>(n = 2635) |                     |
| <b>Fetal and infant growth patterns</b> | Confounder model                                | BMI model           | Confounder model                     | BMI model           |
| Fetal growth deceleration               |                                                 |                     |                                      |                     |
| Infant growth deceleration (n = 106)    | -0.06 (-0.27, 0.14)                             | -0.04 (-0.24, 0.16) | 0.11 (-0.11, 0.32)                   | 0.04 (-0.17, 0.26)  |
| Infant normal growth (n = 296)          | -0.08 (-0.22, 0.05)                             | -0.07 (-0.21, 0.06) | -0.02 (-0.17, 0.12)                  | -0.05 (-0.19, 0.09) |
| Infant growth acceleration (n = 324)    | 0.02 (-0.11, 0.10)                              | 0.01 (-0.13, 0.14)  | -0.05 (-0.19, 0.08)                  | -0.01 (-0.15, 0.13) |
| Fetal normal growth                     |                                                 |                     |                                      |                     |
| Infant growth deceleration (n = 282)    | 0.02 (-0.12, 0.16)                              | 0.04 (-0.10, 0.17)  | 0.12 (-0.02, 0.27)                   | 0.08 (-0.06, 0.22)  |
| Infant normal growth (n = 644)          | <i>Reference</i>                                | <i>Reference</i>    | <i>Reference</i>                     | <i>Reference</i>    |
| Infant growth acceleration (n = 302)    | 0.27 (0.13, 0.40)**                             | 0.24 (0.10, 0.37)** | -0.18 (-0.32, -0.04)*                | -0.10 (-0.24, 0.04) |
| Fetal growth acceleration               |                                                 |                     |                                      |                     |
| Infant growth deceleration (n = 377)    | -0.01 (-0.14, 0.12)                             | -0.01 (-0.14, 0.12) | -0.00 (-0.14, 0.13)                  | -0.00 (-0.14, 0.13) |
| Infant normal growth (n = 385)          | 0.14 (0.01, 0.26)*                              | 0.13 (0.004, 0.25)* | -0.06 (-0.19, 0.07)                  | -0.03 (-0.16, 0.10) |
| Infant growth acceleration (n = 113)    | 0.08 (-0.11, 0.28)                              | 0.05 (-0.14, 0.25)  | -0.06 (-0.26, 0.14)                  | 0.01 (-0.19, 0.22)  |

CI: Confidence interval, BMI: body mass index. \*P value <0.05.

Sensitivity analysis including only children with weight at 24 months old. Values are regression coefficients (95% confidence interval) and reflect the differences in carotid intima media thickness (SDS) and carotid distensibility (SDS) for fetal and infant growth patterns from multivariable linear regression models. Estimates are from multiple imputed data. The confounder model is adjusted for child age at the outcome visit and sex, maternal age, pre-pregnancy body mass index, educational level, ethnicity, folic acid use, smoking and gestational hypertensive disorders. The BMI model is the confounder model additionally adjusted for sex-and gestational age adjusted child body mass index at the outcome measurement.

**eFigure 1.** Flow Chart of the Study Population

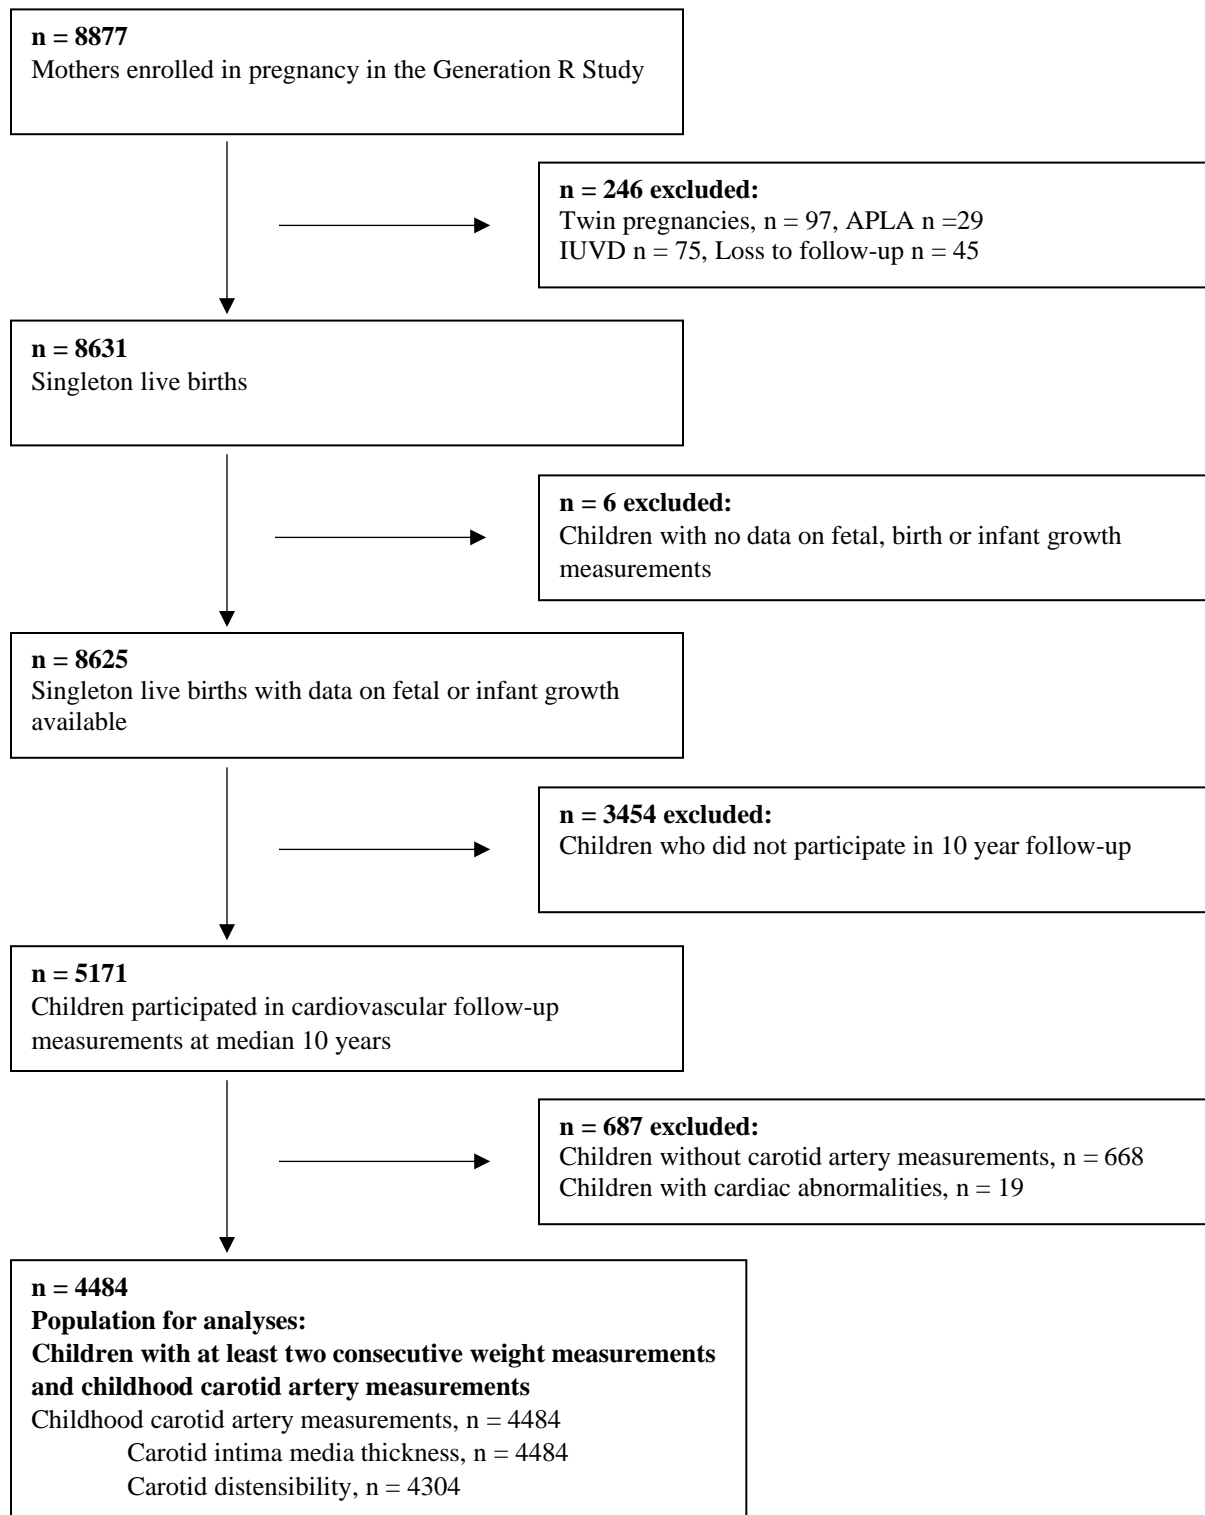

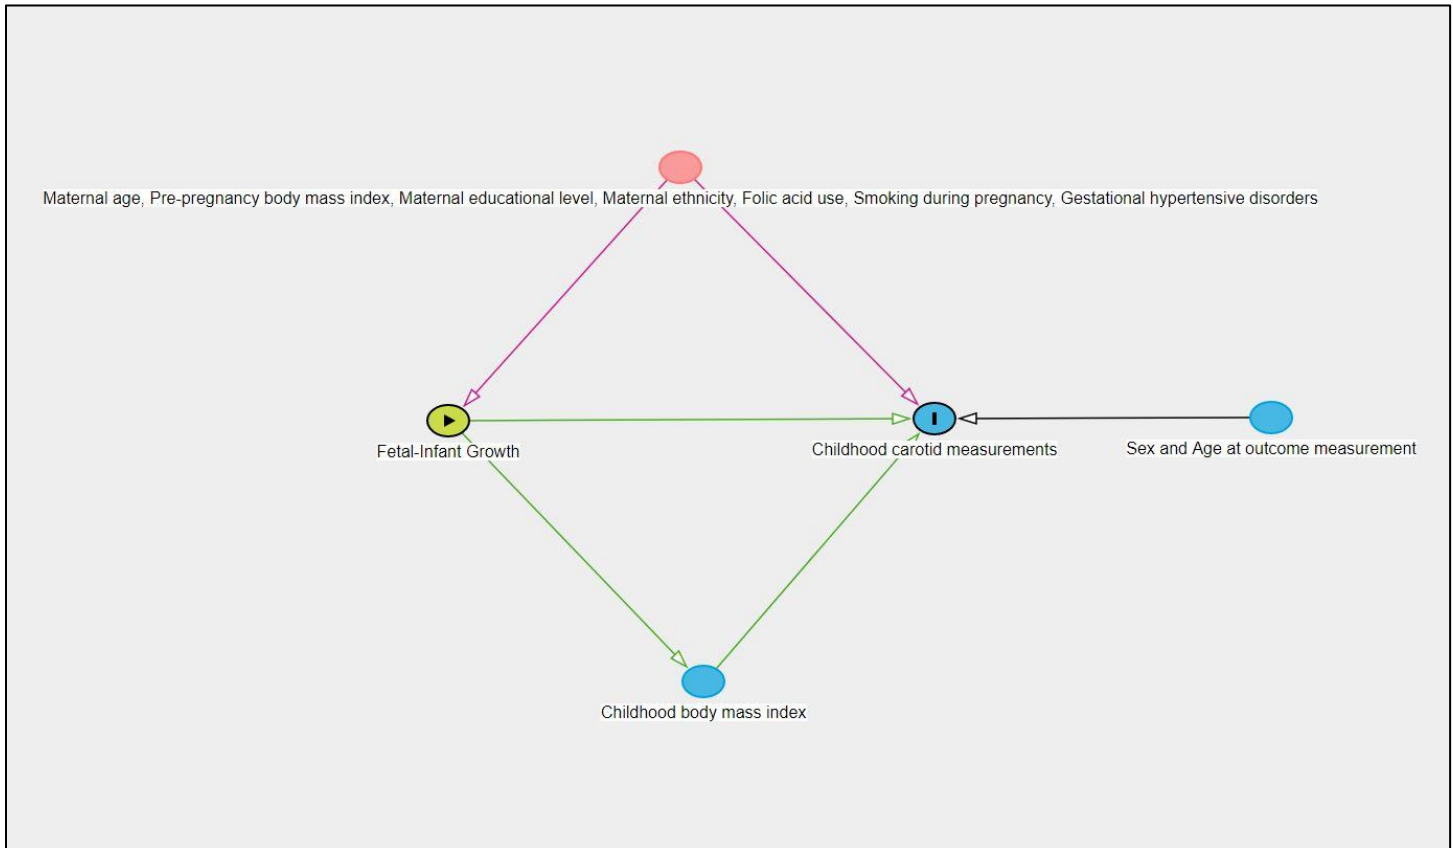

**eFigure 2.** Directed Acyclic Graph (DAG) Depicting the Associations Between Fetal and Infant Weight Measurements, Carotid Intima-Media Thickness, and Distensibility at 10 Years and Potential Covariates, Confounders, and Mediators

## eReference.

1. Mook-Kanamori, D.O., et al., *Risk factors and outcomes associated with first-trimester fetal growth restriction*. JAMA, 2010. **303**(6): p. 527-34.
